# Supplementary material
Source: Research Square preprint supplement (doi:10.21203/rs.3.rs-8840752/v1)
Supplement: Supplementary file 1 [file 8ec10a3d80e609d445b45f52.docx]

# Supplementary materials

## Appendix 1: Topic guide for exploring factors related to patient engagement in physical therapy

| **Question type** | **Question** | **Prompts (depending on the content of the interview):** |
| --- | --- | --- |
| Introductory | What does your current care look like? | Who supports you? What care do they provide? How often do you interact with them? |
| Transition | Are there any care needs at the moment for which no support has been arranged?  Can you give examples of difficulties you experience physically, emotionally, socially, or spiritually? | Which needs? Have you discussed physical therapy with a healthcare provider?  Are there specific problems or needs for which you are not receiving help but consider important? |
| Key | What role do you see for physical therapy within your current care/treatment?  What obstacles do you see in integrating physical therapy into your care?  How do you experience the collaboration between the different healthcare providers involved?  Which components (e.g., duration, frequency, type of activity) are acceptable for you in an exercise program? | What added value or challenges do you see? Are there specific goals where physical therapy could help  Practical reasons (time, cost)? What would motivate you to try physical therapy?  What works well? What could be improved? Can you give an example of good or poor collaboration?  What types or intensity of exercise therapy do you consider suitable? How often and how long would you exercise?  What types or intensity of exercise therapy do you consider suitable? How often and how long would you exercise? |
| Final | [Interviewer summarizes]  Is this a good summary of our conversation? | Is there anything else you’d like to add? How did you find this interview? Any additional remarks or questions? |

## Appendix 2: Topic guide for exploring factors related to physicians’ referral to physical therapy

| **Question type** | **Question** | **Prompts (depending on the content of the interview):** |
| --- | --- | --- |
| Introductory | Could you tell me about your experience referring patients with advanced cancer to physical therapy?  How would you describe your collaboration with physical therapists and other healthcare providers in caring for these patients? | What are the main reasons for referral and how does the process work? How often do you refer, and to whom? Are there specific situations where you refer more frequently? Who usually initiates the referral?  Who is involved? How does communication take place? What works well? What challenges do you experience? |
| Transition | What care needs do you encounter in patients who could benefit from physical therapy?  How do you see the role of physical therapy in addressing these patients’ needs? | What physical, emotional, social, or spiritual needs do you identify? Which of these could physical therapy help address? Which fall outside its scope?  What is the added value of physical therapy? In what situations is it less applicable? How important is it in your overall care approach? |
| Key | What challenges do you experience when referring this group of patients to physical therapy?  What do you see as limitations in current treatments for patients with advanced cancer, and how could physical therapy contribute?  How do you experience interprofessional collaboration in this context?  What components of an exercise program do you consider appropriate for these patients? | Practical or organizational barriers (time, communication, cost, accessibility)? What facilitates referral? What could improve the integration of physical therapy?  Are there patient characteristics that influence physical therapy outcomes? Are there institutional or systemic barriers to integrating physical therapy?  What makes collaboration effective? What factors complicate it? Can you give examples of good or poor collaboration? What would help improve teamwork?  Type, frequency, duration, and intensity of exercises? What would be realistic within your care setting? |
| Final | [Interviewer summarizes]  Is this a good summary of our conversation? | Is there anything else you’d like to add? How did you find this interview? Any additional remarks or questions? |

## Appendix 3: Topic guide for exploring factors related to physical therapists’ physical therapy delivery

| **Question type** | **Question** | **Prompts (depending on the content of the interview):** |
| --- | --- | --- |
| Introductory | Could you tell me about your work experience with patients with advanced cancer?  How would you describe collaboration with other healthcare providers in caring for these patients? | What does your work look like? What comes to mind when you think about this patient group? In what way are you involved in their care? What inspires you? Can you share a moment where you made a difference for a patient?  With whom do you collaborate most (physicians, nurses, psychologists…)? How does communication go? What works well and what could improve? |
| Transition | What care needs do you encounter in your practice among patients who benefit from physical therapy?  How do you see the role of physical therapy in meeting patients’ care needs? | Which specific needs can you address with physical therapy? Which fall outside its scope? Which needs benefit most, or least, from your interventions?  What are your main objectives when treating these patients? How do you adapt your approach to physical, emotional, or existential needs? |
| Key | How do your education and experience prepare you for working with this patient group?  What challenges do you experience in working with patients with advanced cancer?  How do you experience collaboration with physicians and other healthcare providers?  What elements of an exercise program do you consider suitable for this group? | What was most valuable or missing in your training? Have you followed any additional palliative care courses? How confident do you feel in treating this group?  What makes it easier or more difficult? What barriers do you encounter when applying current treatments? What facilitates effective care?  What makes collaboration successful? What are common difficulties? Can you share examples of effective teamwork or communication challenges?  Duration, frequency, intensity, or type of activity? How would you adapt these based on the patient’s condition, progress, or decline? What would be ideal? |
| Final | [Interviewer summarizes]  Is this a good summary of our conversation? | Is there anything else you’d like to add? How did you find this interview? Any additional remarks or questions? |

## Appendix 4: Behavioral theories constructs linked to inductive coding

| **Concept** | **Definition** | **Examples from this study** |
| --- | --- | --- |
| Awareness | Need recognition or problem appraisal (e.g. health condition, care needs etc.) [25]. | *E.g. A patient who is unaware that physical therapy can be part of their cancer care.* |
| Knowledge | The understanding one has of a key concept or the behavior [32]. | *E.g. A physician who lacks clarity on what to specify in prescriptions.* |
| Risk perception | To be aware of a risk for themselves [25]. | *E.g. A patient that accepts that her functional status is getting worse, and that additional help is needed.* |
| Attitude | The individual’s positive or negative evaluation of performing the particular behavior of interest. [25, 32] Attitude consists of behavioral beliefs: outcome beliefs (outcome of the behavior, for example benefits or disadvantages) and evaluation beliefs (how important are these outcomes) [25]. | *E.g. A physical therapist who thinks that physical therapy has an important role to play in relieving suffering.* |
| Perceived behavioral control (self-efficacy) | Subjective probability that a person is capable of executing a certain course of action (ability to perform the behavior and to overcome barriers) [25, 33]. Perceived behavioral control consists of control beliefs [25]. | *E.g. A patient feels physically limited to fully participate in physical therapy.* |
| Social influence | The actual social support or pressure exerted by others that affects behavior. This includes direct encouragement or discouragement from key people such as family, friends, or healthcare professionals. It reflects the social support or pressure to perform or not perform a given behavior [34]. | *E.g. A physical therapist who feels encouraged by the GP to continue the treatment.* |
| Perceived social influence | An individual’s perception of social support or pressure, which may or may not correspond to actual behaviors or expressed opinions. It involves beliefs about whether key people (e.g., family or friends) approve or disapprove of the behavior (normative beliefs), as well as the motivation to comply with these perceived expectations (motivation to comply) [25]. | *E.g. A physical therapist that thinks that the physician doesn’t like it when a patient refuses treatment.* |
| Social norm | Social norms are the shared expectations and unwritten rules within a social group or community regarding which behaviors are considered appropriate, typical, or acceptable. These collective beliefs guide individual behavior by establishing standards that members of the group are expected to follow, often shaping attitudes and actions implicitly rather than through direct communication [25]. | *E.g. Culturally embedded idea: "The end is near, so effort is no longer necessary."* |
| Practical, systemic, and/or organizational factors | The practical, systemic, and/or organizational conditions that facilitate or hinder the performance of the desired behavior. This includes factors such as availability of resources (e.g., time, money, transportation), accessibility of services, organizational procedures, policies, and the level of support provided by the system or organization. [35] | *E.g. Reported limited infrastructure and resources during home visits.* |
| All definitions are mainly based on Eldredge et al. (2016). Planning Health Promotion Programs: An Intervention Mapping Approach. | | |

## Appendix 5: Anonymized patient details

| **Patient** | Gender | Age (years) | Cancer stage + primary tumor | Currently treated by a physiotherapist yes/no |
| --- | --- | --- | --- | --- |
| A | Female | 61-80 y/o | IV Lung cell carcinoma | Yes |
| B | Male | 61-80 y/o | IV Lung cell carcinoma | No |
| C | Male | 61-80 y/o | IV Lung cell carcinoma | Yes |
| D | Female | 41-60 y/o | IV Lung cell carcinoma | No |
| E | Female | 61-80 y/o | IV Lung cell carcinoma | No |
| F | Male | 41-60 y/o | IV Lung cell carcinoma | No |
| G | Female | 61-80 y/o | IV Lung cell carcinoma | No |
| H | Male | 81-100 y/o | IV Mesothelioma | Yes |
| I | Male | 41-60 y/o | IV Lung cell carcinoma | Yes |
| J | Female | 61-80 y/o | IIIB Renal cell carcinoma | Yes |

## Appendix 6: Barriers and facilitators influencing patient engagement

| **Factor** | **Facilitating factors** | **Hindering factors** |
| --- | --- | --- |
| **NON-MODIFIABLE** | | |
| Related to the illness | Low symptom burden. | High symptom burden (fatigue, dyspnea, pain, weakness, fever). |
| Coping | Active coping style; resilient attitude; using PT to maintain routine and independence. | Passive coping style; avoidance; resignation; relying on others excessively. |
| Past experiences | Previous positive PT contact; previous personal/family experience; successful prior rehab. | No prior PT experience; negative past referrals (e.g. misdiagnosis); prior ineffective therapy. |
| Patient character & ethnicity | High PA level pre-diagnosis; “over-doers” motivated; resilient; open to external guidance. | Self-reliance (refuse help); language barriers; low prior PA. |
| **MODIFIABLE** |  |  |
| **Individual level** | | |
| Awareness | Awareness of PT indications and benefits; recognizing body’s needs; understanding potential symptom relief. | Limited awareness of PT options and role in cancer care; misconceptions about insurance coverage. |
| Knowledge | Knowing about PT’s biopsychosocial role; understanding disease/symptoms; awareness of reimbursement and treatment personalization. | Poor understanding of disease; no knowledge of PT for advanced cancer; lack of clarity on reimbursement or own care needs. |
| Attitude towards PT in general & engaging in & initiating PT (incl. reasons (not) to engage)  Attitude: Outcome expectations  Attitude: Multidisciplinary care  Attitude: PA | Value PT as important and necessary, even with advanced cancer; see it as responsibility of self, physician, or hospital; motivation linked to staying active, caring for loved ones, maintaining hobbies and routines; belief in symptom relief, functional improvement, QoL.  Functional improvements, independence, comfort, reduced pain/fatigue, prevention of muscle loss, improved QoL, better respiratory function; structure and feedback; motivation for daily activity.  See collaboration and communication between providers as important; value integrated care.  Believe PA is appropriate and useful, even in advanced cancer; use PT as external motivator when self-discipline is low. | Fear or dislike of PA/relaxation therapies; feeling too ill, weak, or obligated; reluctance due to deterioration; perception that PT is not useful; low expectation of improvement; seeing therapy as burdensome or futile.  Expect therapy to be ineffective; little improvement expected; perceive as obligation.  Consider multidisciplinary involvement necessary only in severe cases; may feel overwhelmed by too many providers.  Fear or dislike of PA/relaxation therapies; feeling too ill, weak, or obligated; prefer autonomous activity; reluctance due to deterioration. |
| Perceived behavioral control | Ability to maintain daily activities with adaptations (work, walking, chores); feeling capable to engage if basic tasks manageable. | Fatigue, energy imbalance, symptom burden, or inability to perform tasks (e.g. dog walking, lifting weights, chores). |
| Risk perception | Acceptance of functional decline and recognition of need for help; willingness to seek support. | Misjudging timing (“still enough time”); denial of need; underestimating functional decline. |
| **Perceived environmental level** | | |
| Social influence | Support from family/friends, encouragement by providers, social comparison, good connection with physical therapist; motivation by positive patient–therapist relationship. | Family’s reluctance or fear of PA; limited encouragement; peer/family scepticism. |
| Perceived social influence | Expectation that physical therapists should be specialized; motivation from physicians/family expectations; fear of being seen as weak, not wanting to burden family. | Perception that not all physical therapists are competent/comfortable; not all physicians raise PT; cultural norms discouraging therapy. |
| Social norm | Peer/family expectations encouraging PA; cultural norms supporting activity. | Cultural/family beliefs perceiving PT as futile at end of life; fear of overexertion by family. |
| **Practical, systemic, and/or organizational factors** | | |
|  | Safe environments; good weather; insurance coverage; flexible timing; access to equipment and technology; multiple settings possible (home, hospital, rehab); technological aids (apps, trackers). | Barriers in access/transport, infrastructure, unclear referral pathways, limited multidisciplinary communication, scheduling difficulties, therapy costs, unsuitable environment, bad weather. |
| **PT:** Physical Therapy, **PA**: Physical Activity, **QoL:** Quality of Life | | |

## Appendix 7: Anonymized physician details

| **Physician** | Gender | Age | GP/oncologist | Extra training |
| --- | --- | --- | --- | --- |
| A | Female | 47 y/o | GP | / |
| B | Female | 25 y/o | GP | / |
| C | Male | 52 y/o | Oncologist | / |
| D | Male | 32 y/o | Oncologist | / |
| E | Male | 46 y/o | GP | CRA-physician |
| F | Female | 39 y/o | Oncologist | / |
| G | Female | 26 y/o | Oncologist | / |
| H | Female | 31 y/o | GP | LEIF-physician |
| I | Female | 44 y/o | Oncologist | / |
| J | Female | 61 y/o | Oncologist | / |
| **GP:** General Practitioner | | | | |

## Appendix 8: Barriers and facilitators influencing oncologists’ referrals

| **Factor** | **Facilitating factors** | **Hindering factors** |
| --- | --- | --- |
| **NON-MODIFIABLE** | | |
| Past experiences | Personal experience with PT; prior positive exposure. | No personal experience with PT. |
| **MODIFIABLE** | | |
| **Individual level** | | |
| Awareness | Aware of certain indications and contraindications for PT; its potential benefits for patients with advanced cancer; early timing of referral. | Limited awareness of the range of PT indications in advanced cancer; low awareness of biopsychosocial scope; concerns about timing of referral and contra-indications. |
| Knowledge | Knowledge of local physical therapists, reimbursement rules, treatment content, and referral processes. | Unfamiliar with nearby physical therapists; unsure what to prescribe; limited knowledge of reimbursement, indications, treatment content; uncertainty about PT documentation; misconceptions about therapy scope. |
| Attitude towards PT in general & referring to & initiating PT (incl. reasons (not) to refer)  Attitude: Outcome expectations  Attitude: Multidisciplinary care  Attitude: Physical therapists  Attitude: PA | Value PT for symptom relief, independence, QoL, part of rehab programs; motivated by evidence and patient needs; expect PT to enhance independence, maintain strength and function, reduce symptoms/side effects, support mental health, foster social connection; trust physical therapists’ coaching and goal setting; value multidisciplinary collaboration.  Expect improved function, symptom relief, independence, QoL; evidence-based motivation (e.g. recently published studies) to refer.  Desire communication and collaboration with physical therapists; value physical therapist input in meetings; co-location enhances collaboration.  Trust in physical therapists’ expertise, autonomy, motivation, coaching, patient connection; expectation for continuous learning.  Value individualized tailoring, light-moderate activity, daily exercise; physical therapists as guides; prefer feedback on PA content/intensity. | PT often seen as secondary to medical treatments; priority given to physical over psychosocial indications; referrals considered less urgent during busy consultations; desire more communication from physical therapists; protective attitudes (e.g. “don’t overburden patient”); undervaluing need for oncology-specialized physical therapists.  Concern over minimal impact in frail or late-stage patients; worry about overburdening; perception of low patient benefit.  Too little communication; physical therapists lack access to patient files; dependence on referrals limits access; suboptimal integration into multidisciplinary teams.  Expect physical therapists to “train” rather than be too soft; some undervalue need for oncology training; variable competence. |
| Perceived behavioral control | Advocate PA during consultations; influence patients’ engagement. | Struggle to identify competent physical therapists and write appropriate prescriptions; referral processes suboptimal. |
| **Perceived environmental level** | | |
| Social influence | Encouragement from colleagues (e.g., coordinating physical therapists), positive peer examples; family ties to physical therapists. | - |
| Perceived social influence | Referrals shaped by family expectations, patient motivation, socio-cultural context, prior experiences, role perceptions of physical therapists. | Same factors can hinder if family burden, cultural views, or doubts about competence are present. |
| Social norm | - | Cultural and professional norms that deprioritize PT; low integration in hospital routines. |
| **Practical, systemic, and/or organizational factors** | | |
|  | Facilitators: technology, referral pathways, accessibility, time, resources; electronic referral systems. | Lack of structured referral systems; limited multidisciplinary communication; fragmented documentation; variability in physical therapists’ competence; time constraints; hospital vs primary care differences. |
| **PT:** Physical Therapy, **PA**: Physical Activity, **QoL**: Quality of Life | | |

## Appendix 9: Barriers and facilitators influencing GPs' referrals

| **Factors** | **Facilitating factors** | **Hindering factors** |
| --- | --- | --- |
| **MODFIABLE** | | |
| **Individual level** | | |
| Awareness | | Aware of PT for oncology patients including palliative phase; aware of indications and contraindications; refer for physical & psychosocial reasons. | | --- | | Unaware of several PT indications in advanced cancer; limited awareness of end-of-life PT. |
| Knowledge | Knowledge about PT for oncology patients; know local physical therapists; understand some reimbursement rules. | Lack of knowledge on group programs, oncology & end-of-life PT; unsure what to write on prescription; uncertain about specialized vs regular PT; limited knowledge on modalities, benefits, specializations, reimbursement. |
| Attitude towards PT in general & referring to & initiating PT (incl. reasons (not) to refer)  Attitude: Outcome expectations  Attitude: Multidisciplinary care  Attitude: PA | See themselves/shared as initiators; value specialized physical therapists but not always obligatory; believe every patient could benefit; consider prognosis, disease stage, functional/mobility issues; patient-reported problems; disease-/treatment-specific indications; expect preservation of independence, symptom/pain management, mental/emotional support; value multidisciplinary care, communication, trust, role clarity; prefer light–moderate intensity, individual tailoring, functional/daily focus, caution.  Expect preservation of independence, muscle strength & functioning; symptom and pain management; mental and emotional wellbeing support.  Value collaboration, communication, shared decision-making; clear role delineation.  Prefer light–moderate intensity; functional activities; individualized; caution; delegated to physical therapists. | Some complaints require specialists; referrals often deprioritized over other care; do not refer if specialist palliative care services are initiated, patient refuses, or poor prognosis; concern about possible harm (e.g., fractures); lack of trust, unclear communication, role ambiguity; unsuitable when specialist palliative care services are initiated.  Concern about possible harm (e.g., fractures).  Same issues (lack of trust, unclear communication, role ambiguity) can act as barriers.  Unsuitable when specialist palliative care services are initiated. |
| Perceived behavioral control | Feel capable when knowledgeable; take initiative for patient advice. | Lack of knowledge; cognitive load & competing priorities; limited patient contact; difficulty initiating referrals. |
| **Perceived environmental level** | | |
| Social influence | Positive patient results; public awareness campaigns. | - |
| Perceived social influence | Positive patient attitudes; social support; peer/colleague influence; trustful physical therapist–patient relationship. | Negative patient attitudes; limited patient availability; too many providers involved; doubts about physical therapists’ competence/availability. |
| Social norm | - | Usual practice norms (e.g., preference of clinic-based over home visits) create barriers. |
| **Practical, systemic, and/or organizational factors** | | |
|  | Supportive technology; care settings (e.g., nursing homes); transport support & home-based options; reimbursement for special groups; local PT networks; e-health/chat systems; efficient admin; government recognition/accreditation. | Language/cultural barriers; technological & setting-related barriers; complex home situations; limited reimbursement & out-of-pocket costs; unclear referral pathways; scarce GP-initiated referrals; limited feedback; consultation time pressure; hospital-dominant care trajectories; lack of PT profiling in oncology/palliative care. |
| **PT:** Physical Therapy, **PA**: Physical Activity, **QoL**: Quality of Life | | |

## Appendix 10: Anonymized physical therapist details

| **Physical Therapist** | Gender | Age | Setting | Extra training |
| --- | --- | --- | --- | --- |
| A | Female | 32 y/o | Owner of a private practice specialized in general/sports physical therapy | Postgraduate training in oncology |
| B | Female | 52 y/o | Owner of a private practice specialized in general physical therapy | Postgraduate training in oncology |
| C | Female | 56 y/o | Nursing home (previously owner of private practice specialized in oncology/lymphology) | Postgraduate training in oncology |
| D | Female | 47 y/o | Owner of private practice specialized in oncology/lymphology | Postgraduate training in oncology |
| E | Male | 58 y/o | Head of inpatient oncological rehabilitation of a hospital | / |
| F | Female | 33 y/o | Owner of private practice specialized in oncology and working in a hospital’s outpatient rehabilitation | Postgraduate training in oncology |
| G | Female | 25 y/o | Working in a private practice specialized in general/sports physical therapy | / |
| H | Male | 24 y/o | Working in a private practice specialized in general/sports physical therapy | / |
| I | Female | 24 y/o | Working in a nursing home and a hospital’s outpatient rehabilitation | Master training in Internal Disorders |
| J | Male | 54 y/o | Working in a nursing home | Postgraduate training in palliative care |

## Appendix 11: Barriers and facilitators influencing treatment delivery

| **Factor** | **Facilitating factors** | **Hindering factors** |
| --- | --- | --- |
| **NON-MODIFIABLE** |  |  |
| Past experiences | Personal/family experience with cancer; thesis/practical experience enrich skills. | Limited direct experience with patient population. |
| **MODFIABLE** | | |
| **Individual level** | | |
| Awareness | Aware of safety precautions, red flags (e.g., bone metastases), reimbursement options, own limits (referring when outside expertise). | Unaware of end-of-life PT options. |
| Knowledge | Peer-to-peer knowledge exchange; reading publications; pursuing extra training; oncology master’s partly prepares; some useful post-graduate training; previous practical experience; awareness of palliative statute. | Lack of specific training; gaps in reimbursement knowledge; master’s insufficient for advanced care; no preparation during bachelor/master; initial uncertainty with complex patients. |
| Attitude towards delivering PT (incl. reasons (not) to deliver)  Attitude: Outcome expectations  Attitude: Multidisciplinary care  Attitude: PA | Emphasize pain control, continuity of care, personalized/flexible approach; strong patient-therapist bond; importance of psychosocial domain; recognize coping variations; open role perception; prioritize comfort and motivation; acknowledge family; patient-centered goals; value collaboration with GPs/oncologists; attention to frequency, intensity, duration, type of activity; balance guidance & autonomy; promote activity; meaningful, impactful work.  Pain/symptom relief; maintain/improve function and QoL; physical, psychological, social benefits; emotional and relational benefits; professional satisfaction.  Collaboration with all providers; use communication tools; mutual support; integration in hospitals/nursing homes; coordination with nurses.  Balance guidance & autonomy; personalize frequency, intensity, duration; maintain activity whenever possible; do not forbid activity categorically. | Barriers: hospitalization setting (private practice), short admissions, limited time due to treatments, very advanced deterioration, patient wishes/needs, emotional strain, limited info when not hospital-based, indirect contact, staff shortages, disagreements with nurses, discomfort with comorbidities, patient refusal, uncertainty with unfamiliar patients.  Absent patient willingness or perceived need limits intervention possibilities.  Collaboration depends on personal ties; limited information when not hospital-based; indirect contact; disagreements with nurses; staff shortages harm care quality.  Patient refusal; day-to-day variability; safety limits; discomfort with illness communication. |
| Perceived behavioral control | Certain physical therapists are comfortable with bone metastases; hospital referral system works well; confident in listening, supporting, tailoring care; recognize variability day by day. | Some are less comfortable with comorbidities, brain and bone metastases; knowledge gaps on pathology; uncertainty at treatment start; discomfort with unfamiliar patients. |
| **Perceived environmental level** | | |
| Social influence | Recognition/appreciation from physicians, patients, families; peer support; learning from colleagues. | Pressure from families to go beyond “physical” role; perception that physicians prioritize medication and underestimate psychosocial role. |
| Perceived social influence | Expectation that family/physicians encourage PT; sense of unburdening nurses; perception peers find it hard to see progress. | Pressure from families; perception that physicians underestimate PT’s role. |
| Social norm | See oncologists as main referrers; palliative home care underused; patients self-indicate when to stop. | Physicians too blunt/overprotective; referrals too short; culturally embedded fatalism; limited preventive referrals. |
| **Practical, systemic, and/or organizational factors** | | |
|  | Supportive settings; transport/logistical support; reimbursement; referral autonomy; multidisciplinary meetings; flexible timing; palliative policies. | Medical treatments interfering; language/cultural barriers; mobility limits; unpaid time for multidisciplinary meetings; limited time per patient; lack of training/policy support. |
| **PT:** Physical Therapy, **PA**: Physical Activity, **QoL**: Quality of Life | | |
